# Supplementary material for: Bistriazole-p-benzoquinone and its alkali salts: electrochemical behaviour in aqueous alkaline solutions
Source: Royal Society of Chemistry journal article supplement (doi:10.1039/c7dt02803b), 2017-01-01
Supplement: c7dt02803b1.pdf [file c7dt02803b1.pdf]

## Bistriazole-*p*-benzoquinone and its alkali salts: electrochemical behaviour in aqueous alkaline solutions

Hana Bunzen\*, Anton Lamp, Maciej Grzywa, Christa Barkschat, Dirk Volkmer

Chair of Solid State and Materials Chemistry, Institute of Physics, University of Augsburg,  
Universitätsstraße 1, D-86159 Augsburg, Germany

### Content:

|                                                                                                                                                                     |     |
|---------------------------------------------------------------------------------------------------------------------------------------------------------------------|-----|
| <b>1) Thermogravimetric analysis of H<sub>2</sub>-btbq·2H<sub>2</sub>O</b>                                                                                          | S2  |
| <b>2) <sup>13</sup>C NMR spectrum of H<sub>2</sub>-btbq·2H<sub>2</sub>O</b>                                                                                         | S2  |
| <b>3) IR spectra of H<sub>2</sub>-btbq·2H<sub>2</sub>O and its alkali salts</b>                                                                                     | S3  |
| <b>4) Solubility of H<sub>2</sub>-btbq·2H<sub>2</sub>O in alkaline aqueous solutions</b>                                                                            | S4  |
| <b>5) VT-XRPD measurements of Li<sub>2</sub>-btbq·2H<sub>2</sub>O, Na<sub>2</sub>-btbq·4H<sub>2</sub>O and K<sub>2</sub>-btbq·2H<sub>2</sub>O</b>                   | S5  |
| <b>6) CV measurements of H<sub>2</sub>-btbq·2H<sub>2</sub>O in basic aqueous solutions</b>                                                                          | S6  |
| <b>7) X-ray single crystal analysis</b>                                                                                                                             | S9  |
| Optical microscopy images of H <sub>2</sub> -btbq·2H <sub>2</sub> O and its alkali salts                                                                            | S9  |
| Measured and simulated XRPD patterns of Li <sub>2</sub> -btbq·2H <sub>2</sub> O, Na <sub>2</sub> -btbq·4H <sub>2</sub> O and K <sub>2</sub> -btbq·2H <sub>2</sub> O | S9  |
| X-ray single crystal analysis of Li <sub>2</sub> -btbq·2H <sub>2</sub> O                                                                                            | S10 |
| X-ray single crystal analysis of Na <sub>2</sub> -btbq·4H <sub>2</sub> O                                                                                            | S13 |
| X-ray single crystal analysis of K <sub>2</sub> -btbq·2H <sub>2</sub> O                                                                                             | S19 |

### 1) Thermogravimetric analysis of $\text{H}_2\text{-btbq}\cdot 2\text{H}_2\text{O}$

The TG analysis of  $\text{H}_2\text{-btbq}\cdot 2\text{H}_2\text{O}$  revealed two steps (Fig. S1). The first step corresponds to the removal of two water molecules (measured: 16.21 %; calculated: 15.92 %). At the second step around 300 °C, the material decomposes (with explosive violence).

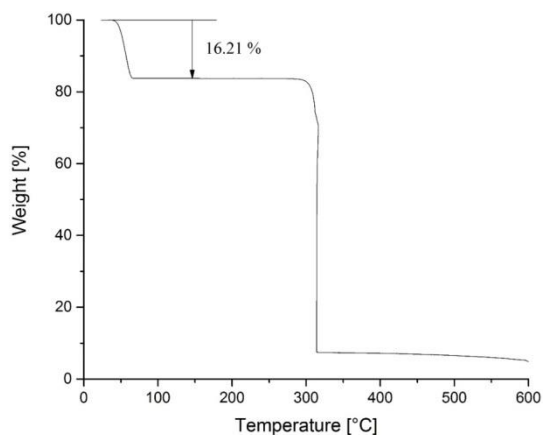

Fig. S1 Thermal stability of  $\text{H}_2\text{-btbq}\cdot 2\text{H}_2\text{O}$  studied by TG analysis under a nitrogen atmosphere.

### 2) $^{13}\text{C}$ NMR spectrum of $\text{H}_2\text{-btbq}\cdot 2\text{H}_2\text{O}$

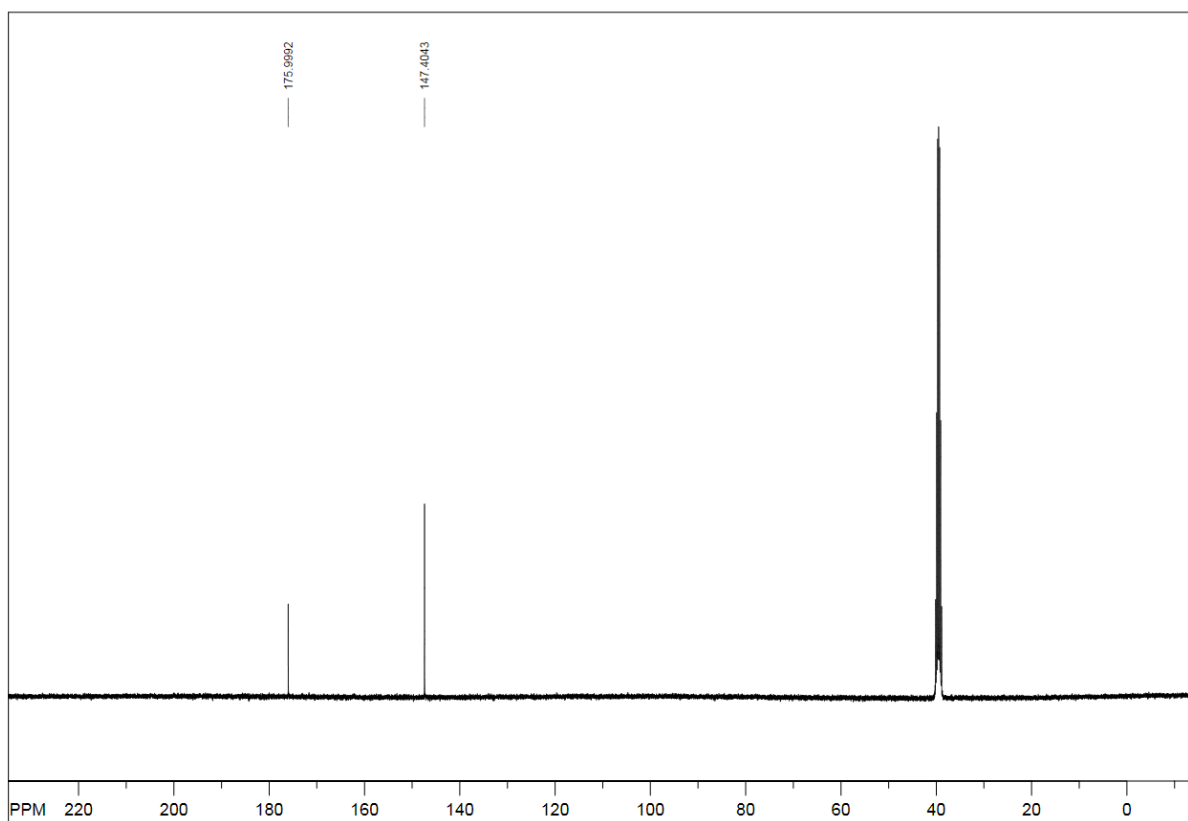

Fig. S2  $^{13}\text{C}$  NMR spectrum of  $\text{H}_2\text{-btbq}\cdot 2\text{H}_2\text{O}$  in  $d_6\text{-DMSO}$ .

### 3) IR spectra of H<sub>2</sub>-btbq·2H<sub>2</sub>O and its alkali salts

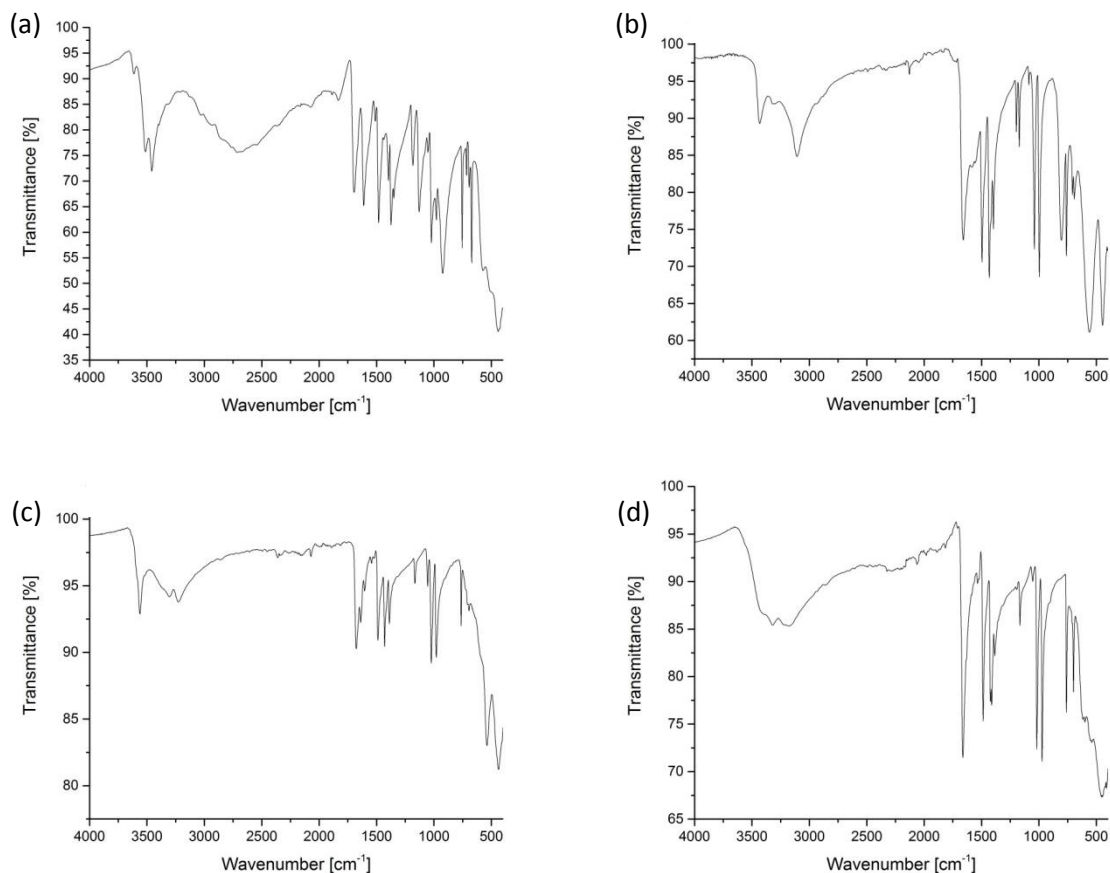

Fig. S3 IR spectra of (a) H<sub>2</sub>-btbq·2H<sub>2</sub>O, (b) Li<sub>2</sub>-btbq·2H<sub>2</sub>O, (c) Na<sub>2</sub>-btbq·4H<sub>2</sub>O and (d) K<sub>2</sub>-btbq·2H<sub>2</sub>O.

a)  $\bar{\nu}$  = 3513, 3457, **1699 (C=O)**, 1612, 1510, 1482, 1396, 1374, 1349, 1182, 1130, 1052, 1022, 978, 925, 754, 716, 694, 672 and 447 cm<sup>-1</sup>.

b)  $\bar{\nu}$  = 3432, 3105, **1663 (C=O)**, 1584, 1552, 1496, 1433, 1397, 1197, 1172, 1088, 1040, 997, 806, 760, 707, 691, 572 and 440 cm<sup>-1</sup>.

c)  $\bar{\nu}$  = 3560, 3300, 3224, **1673 (C=O)**, 1638, 1603, 1487, 1429, 1388, 1165, 1054, 1022, 979, 763, 695, 536 and 430 cm<sup>-1</sup>.

d)  $\bar{\nu}$  = 3320, 3172, **1664 (C=O)**, 1534, 1486, 1422, 1412, 1385, 1165, 1053, 1018, 973, 760, 699, 599 and 449 cm<sup>-1</sup>.

#### 4) Solubility of H<sub>2</sub>-btbq·2H<sub>2</sub>O in alkaline aqueous solutions

The room temperature solubility of H<sub>2</sub>-btbq·2H<sub>2</sub>O in a 1M solution of NaOH and KOH was determined by measuring the absorbance maximum in the visible range at 380 nm and comparing to an absorbance-vs.-concentration calibration curve determined by preparing known concentrations of H<sub>2</sub>-btbq·2H<sub>2</sub>O in the alkaline solutions. UV-Vis spectroscopy measurements were performed using an Agilent Cary 60 spectrophotometer. A stock solution of H<sub>2</sub>-btbq·2H<sub>2</sub>O was prepared by dissolving a known amount of the compound in a known volume of a 1M NaOH or KOH solution. Appropriate aliquots of the H<sub>2</sub>-btbq stock solution were added to 1M NaOH or KOH blank solutions and their UV-Vis absorbance spectra were measured to prepare the calibration curves. Then, saturated solutions of H<sub>2</sub>-btbq·2H<sub>2</sub>O in a 1M NaOH or KOH solution were prepared by adding H<sub>2</sub>-btbq·2H<sub>2</sub>O into the corresponding alkaline solution until a thin layer of precipitate formed. The obtained solutions were filtered through a pad of cotton and a known volume was diluted by known proportions of a 1M NaOH or KOH solution, and the absorbance of the resulting solutions was compared to the calibration curves.

##### Solubility in 1M NaOH:

| Conc. (mg/mL) | Absorbance at 380 nm |
|---------------|----------------------|
| 0.0000        | 0.0000               |
| 0.0125        | 0.0209               |
| 0.0250        | 0.0384               |
| 0.0375        | 0.0620               |
| 0.0500        | 0.0772               |

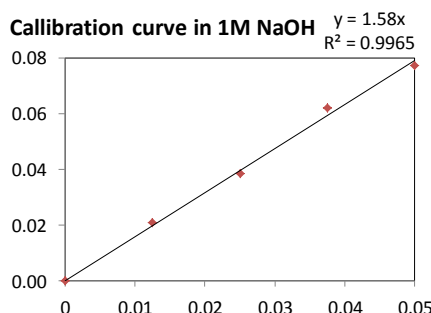

##### Saturated solution:

1 mg of H<sub>2</sub>-btbq·2H<sub>2</sub>O was dispersed in 5 mL of 1M NaOH and the mixture was filtrated through a pad of cotton. 1 mL of the filtrate was mixed with 1 mL of 1M NaOH and the absorption of the solution was measured and re-calculated to the concentration of the saturated solution.

$$A = 0.0797 \rightarrow c = 0.0504 \text{ mg/mL} \rightarrow \rightarrow c_{\text{saturated solution}} = \mathbf{0.10 \text{ mg/mL}}$$

##### Solubility in 1M KOH:

| Conc. (mg/mL) | Absorbance at 380 nm |
|---------------|----------------------|
| 0.00          | 0.0000               |
| 0.05          | 0.0804               |
| 0.10          | 0.1830               |
| 0.15          | 0.2973               |
| 0.20          | 0.4055               |

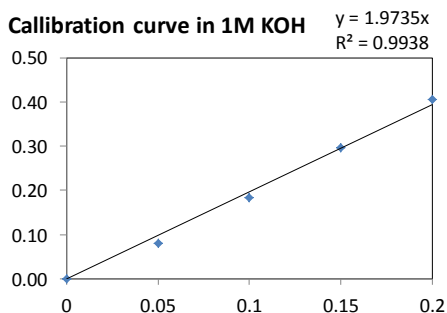

##### Saturated solution:

5 mg of H<sub>2</sub>-btbq·2H<sub>2</sub>O was dispersed in 500 μL of 1M KOH and the mixture was filtrated through a pad of cotton. 100 μL of the filtrate was mixed with 1.9 mL of 1M KOH and the absorption of the solution was measured and re-calculated to the concentration of the saturated solution.

$$A = 0.783 \rightarrow c = 0.397 \text{ mg/mL} \rightarrow \rightarrow c_{\text{saturated solution}} = \mathbf{7.94 \text{ mg/mL}}$$

##### Solubility in 1M LiOH:

H<sub>2</sub>-btbq·2H<sub>2</sub>O is very well soluble in a 1M LiOH solution. More than 100 mg could be dissolved in 1 mL, and therefore, the precise value was not determined by the UV-Vis method.

$$c_{\text{saturated solution}} = > \mathbf{100 \text{ mg/mL}}$$

5) VT-XRPD measurements of  $\text{Li}_2\text{-btbq}\cdot 2\text{H}_2\text{O}$ ,  $\text{Na}_2\text{-btbq}\cdot 4\text{H}_2\text{O}$  and  $\text{K}_2\text{-btbq}\cdot 2\text{H}_2\text{O}$

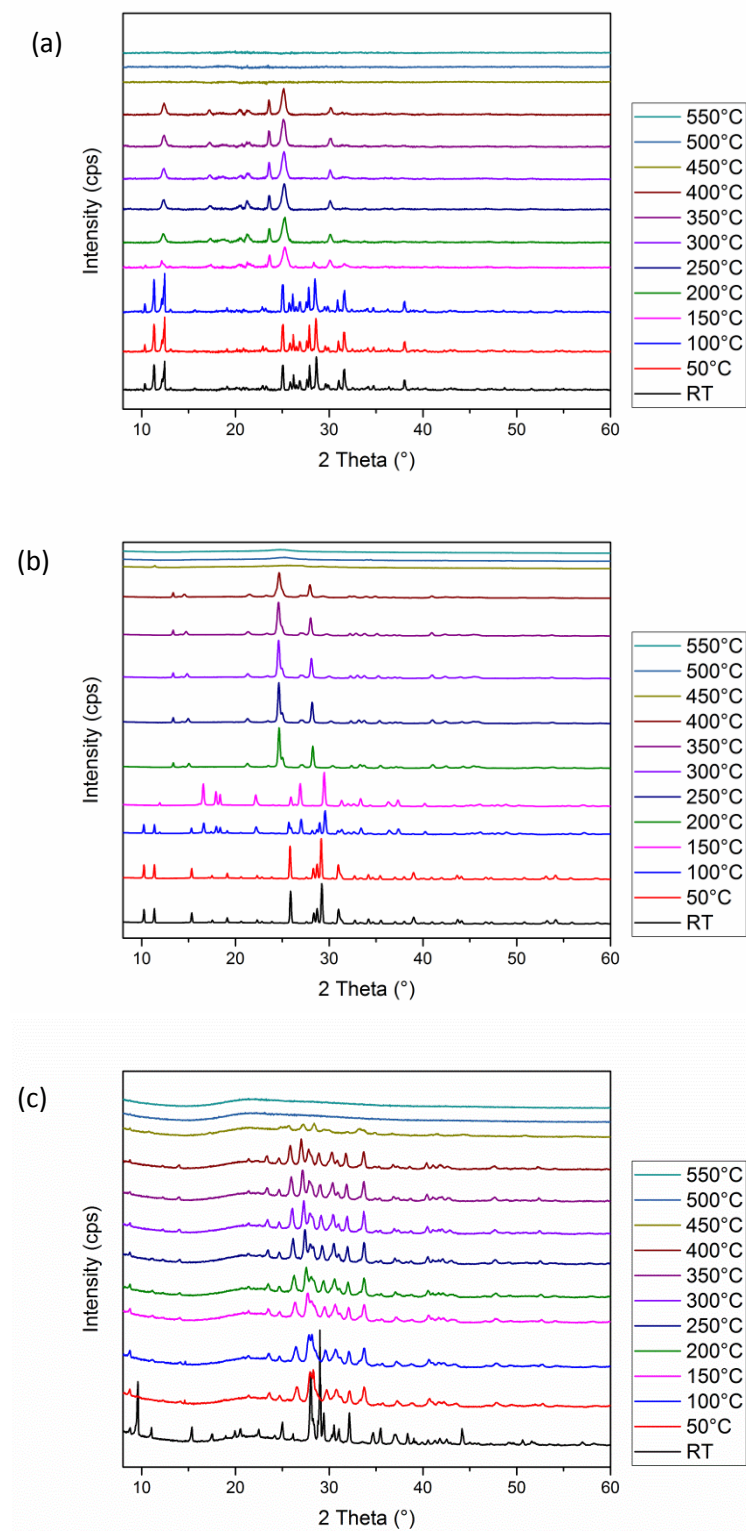

Fig. S4 Variable temperature XRPD measurements of (a)  $\text{Li}_2\text{-btbq}\cdot 4\text{H}_2\text{O}$ , (b)  $\text{Na}_2\text{-btbq}\cdot 4\text{H}_2\text{O}$  and (c)  $\text{K}_2\text{-btbq}\cdot 2\text{H}_2\text{O}$  exposed to a nitrogen atmosphere.

## 6) CV measurements of H<sub>2</sub>-btbq·2H<sub>2</sub>O in basic aqueous solutions

The CV measurements were carried out on a biologic SP-300 potentiostat using a conventional three-electrode system. The electrochemical cell was equipped with a glassy carbon working electrode (3 mm in a diameter), a saturated calomel electrode (SCE) as a reference electrode and a platinum wire counter-electrode. The experiments were carried out at room temperature at different scan rates from 1000 to 10 mV s<sup>-1</sup> in a 1M, oxygen free, aqueous solution of LiOH, NaOH, KOH and Bu<sub>4</sub>NOH. In the case of using a solution of LiOH and KOH, 2 mg of H<sub>2</sub>-btbq·2H<sub>2</sub>O (0.009 mmol) in 10 mL were used. In the case of using a solution of NaOH and Bu<sub>4</sub>NOH, only 1 mg of H<sub>2</sub>-btbq·2H<sub>2</sub>O (0.004 mmol) in 10 mL was used (higher amount was not possible to use due to the limited solubility of H<sub>2</sub>-btbq in the solutions).

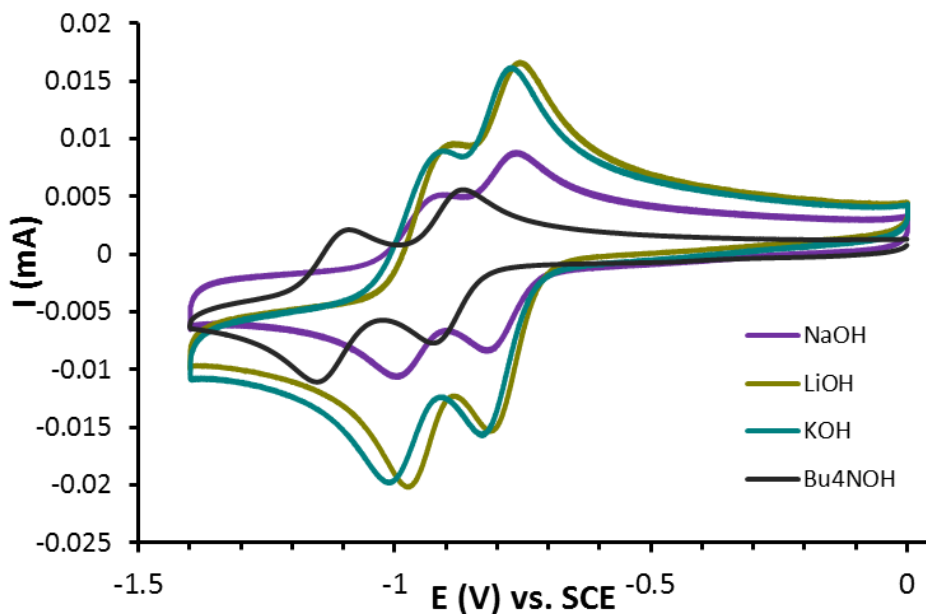

Fig. S5 Cyclic voltammograms of H<sub>2</sub>-btbq·2H<sub>2</sub>O in a 1M aqueous solution of LiOH, NaOH, KOH and Bu<sub>4</sub>NOH measured at room temperature at the rate of 100 mV·s<sup>-1</sup>.

Table S1 Redox potentials ( $E_1^0$  and  $E_2^0$ ), corresponding anodic and cathodic peak potential differences ( $\Delta E$ ) and differences between the redox potentials in different aqueous basic electrolytes.

| Base                | $E_1^0$ (mV)<br>vs. SCE | $\Delta E$ (mV) | $E_2^0$ (mV)<br>vs. SCE | $\Delta E$ (mV) | $E_{1,metal}^0 - E_{1,Bu_4NOH}^0$<br>(mV) | $E_{2,metal}^0 - E_{2,Bu_4NOH}^0$<br>(mV) |
|---------------------|-------------------------|-----------------|-------------------------|-----------------|-------------------------------------------|-------------------------------------------|
| LiOH                | -782                    | 57              | -928                    | 86              | 86                                        | 138                                       |
| NaOH                | -790                    | 57              | -953                    | 88              | 78                                        | 113                                       |
| KOH                 | -799                    | 57              | -958                    | 106             | 69                                        | 108                                       |
| Bu <sub>4</sub> NOH | -868                    | 58              | -1066                   | 86              | -                                         | -                                         |

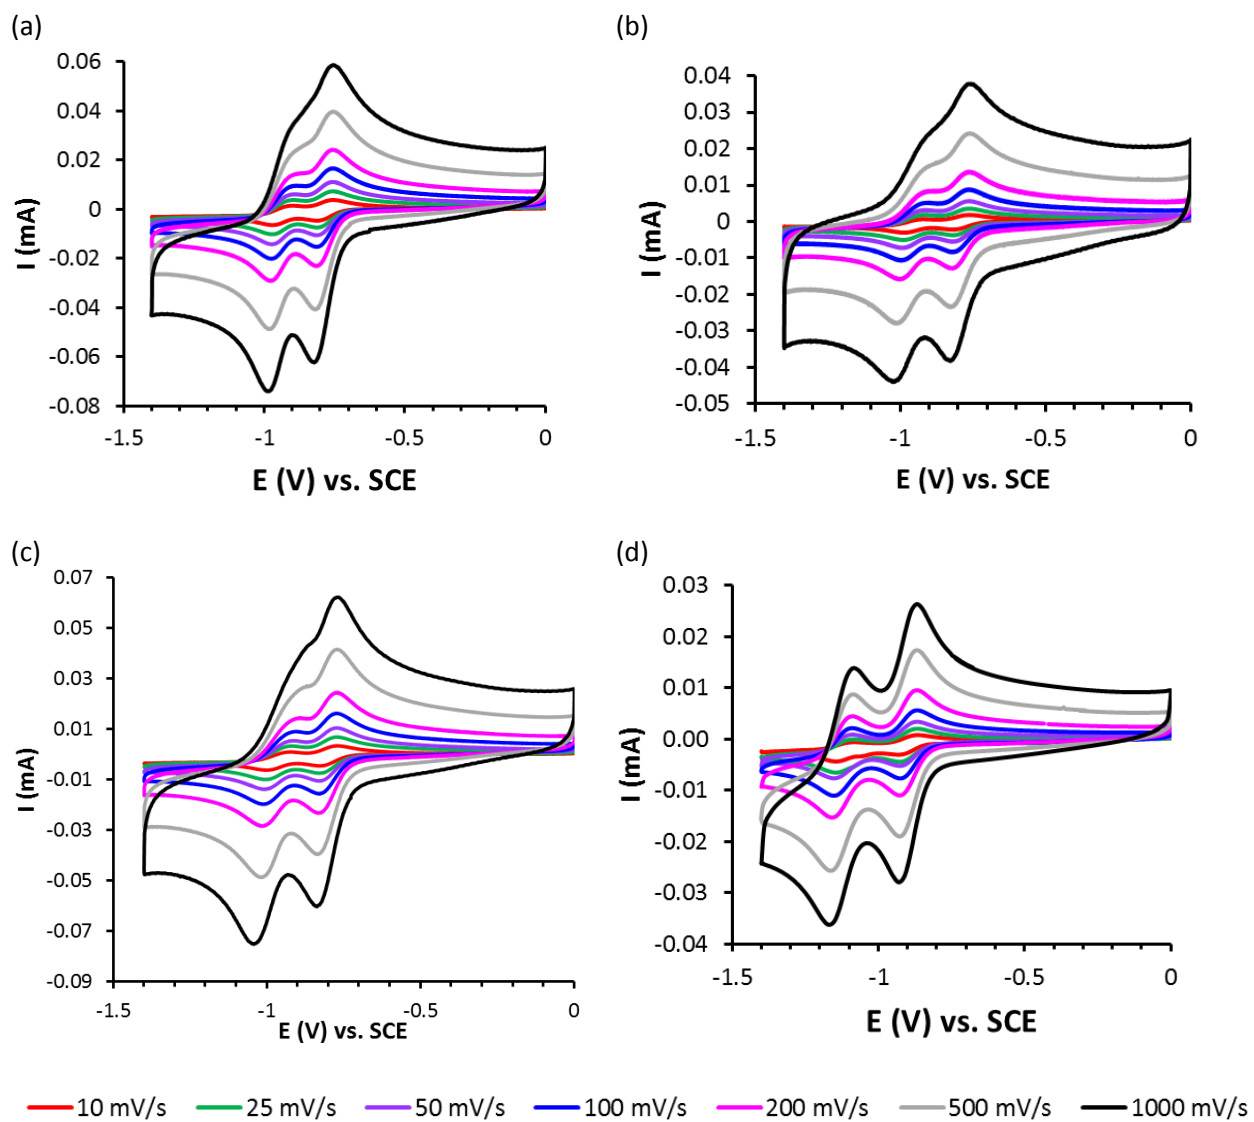

Fig. S6 CV measurements of H<sub>2</sub>-btbq·2H<sub>2</sub>O in 1M (a) LiOH, (b) NaOH, (c) KOH and (d) Bu<sub>4</sub>NOH at the scan rate of 10, 25, 50, 100, 200, 500 and 1000 mV·s<sup>-1</sup>.

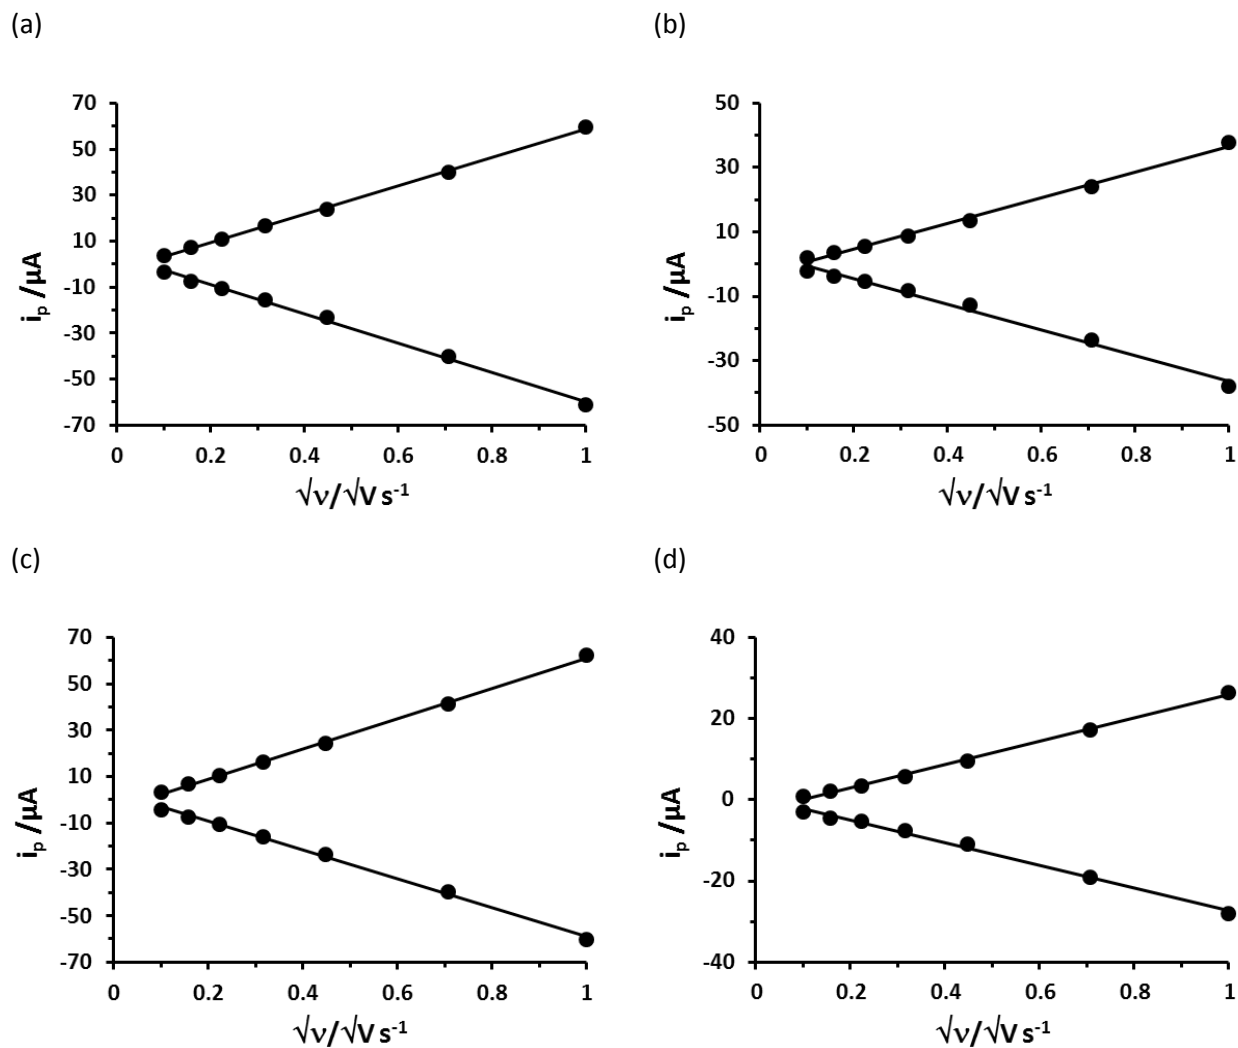

Fig. S7 Randles-Sevcik plots of  $i_p$  against  $\sqrt{v}$  of  $\text{H}_2\text{-btbq}\cdot 2\text{H}_2\text{O}$  in 1M (a) LiOH, (b) NaOH, (c) KOH and (d)  $\text{Bu}_4\text{NOH}$ . Data refer to the first reduction and the corresponding oxidation wave and indicate a diffusion controlled electrode reaction.



## 7) X-ray single crystal analysis

### *Optical microscopy images of $H_2$ -btbq·2H<sub>2</sub>O and its alkali salts*

Images of crystals were taken using an Olympus IX70 microscope equipped with a camera.

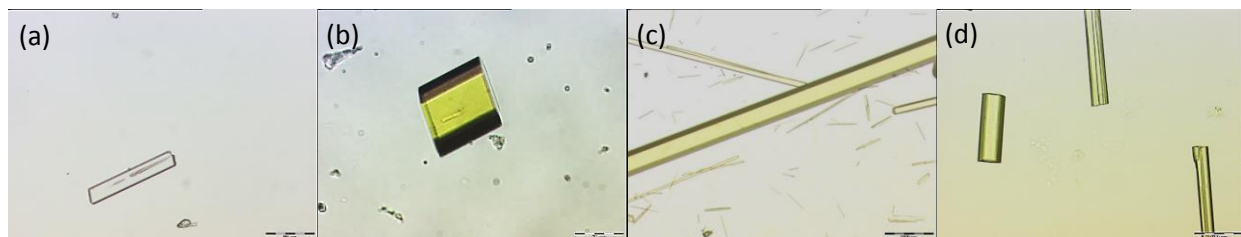

Fig. S8 Optical microscopy images of crystals of (a)  $H_2$ -btbq·2H<sub>2</sub>O, (b)  $Li_2$ -btbq·2H<sub>2</sub>O, (c)  $Na_2$ -btbq·4H<sub>2</sub>O and (d)  $K_2$ -btbq·2H<sub>2</sub>O; scale bar: 50  $\mu$ m (a, b) and 100  $\mu$ m (c, d).

### *Measured and simulated XRPD patterns of $Li_2$ -btbq·2H<sub>2</sub>O, $Na_2$ -btbq·4H<sub>2</sub>O and $K_2$ -btbq·2H<sub>2</sub>O*

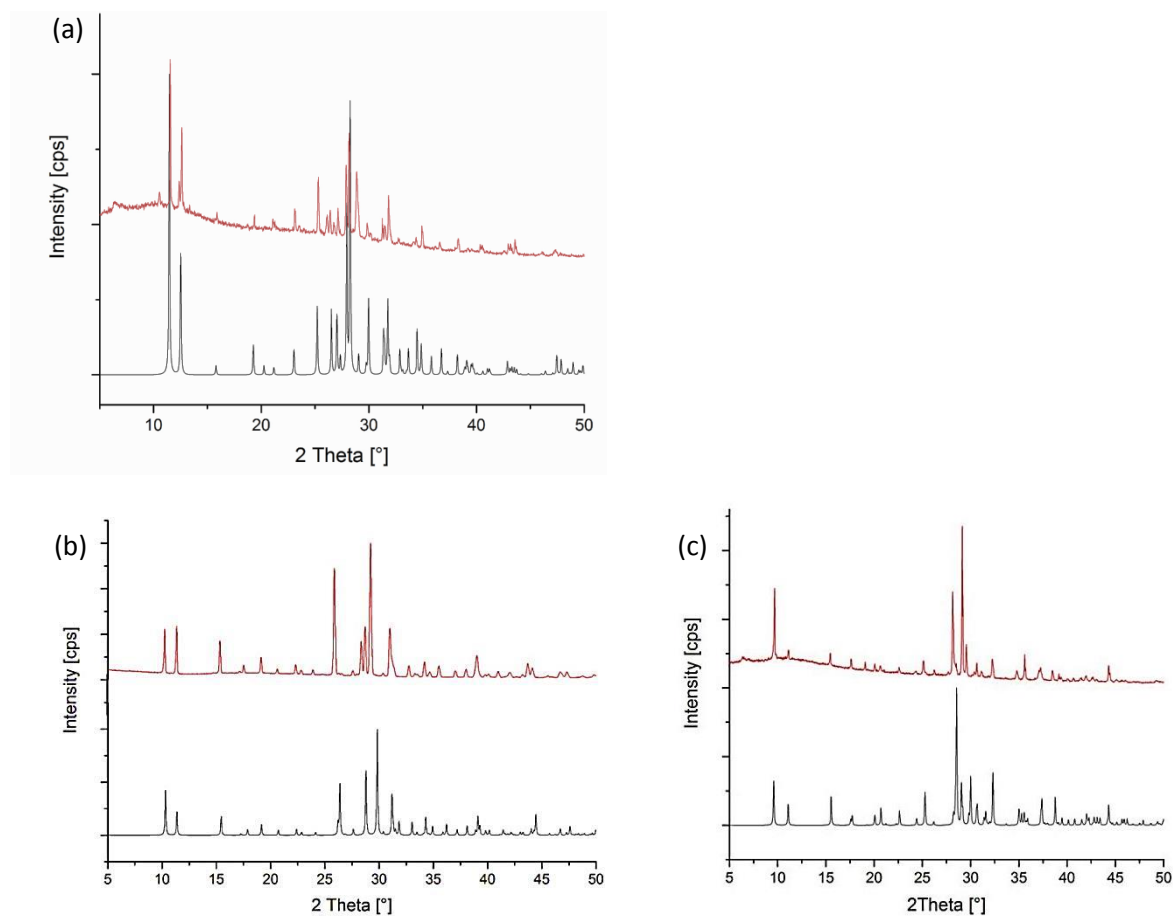

Fig. S9 Simulated (black) and measured (red) XRPD patterns of (a)  $Li_2$ -btbq·2H<sub>2</sub>O, (b)  $Na_2$ -btbq·4H<sub>2</sub>O and (c)  $K_2$ -btbq·2H<sub>2</sub>O (bulk samples).

***X-ray single crystal analysis of  $\text{Li}_2\text{-btbq}\cdot 2\text{H}_2\text{O}$***

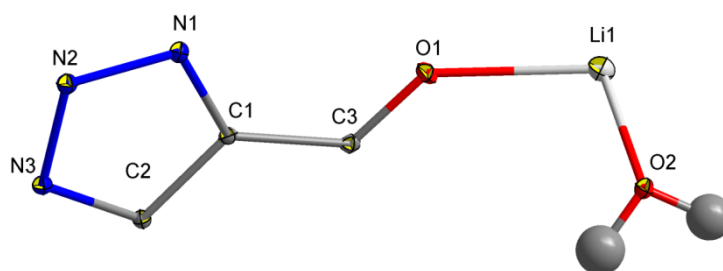

Fig. S10 ORTEP-style plot of the asymmetric units of  $\text{Li}_2\text{-btbq}\cdot 2\text{H}_2\text{O}$ . Thermal ellipsoids probability: 50 %.

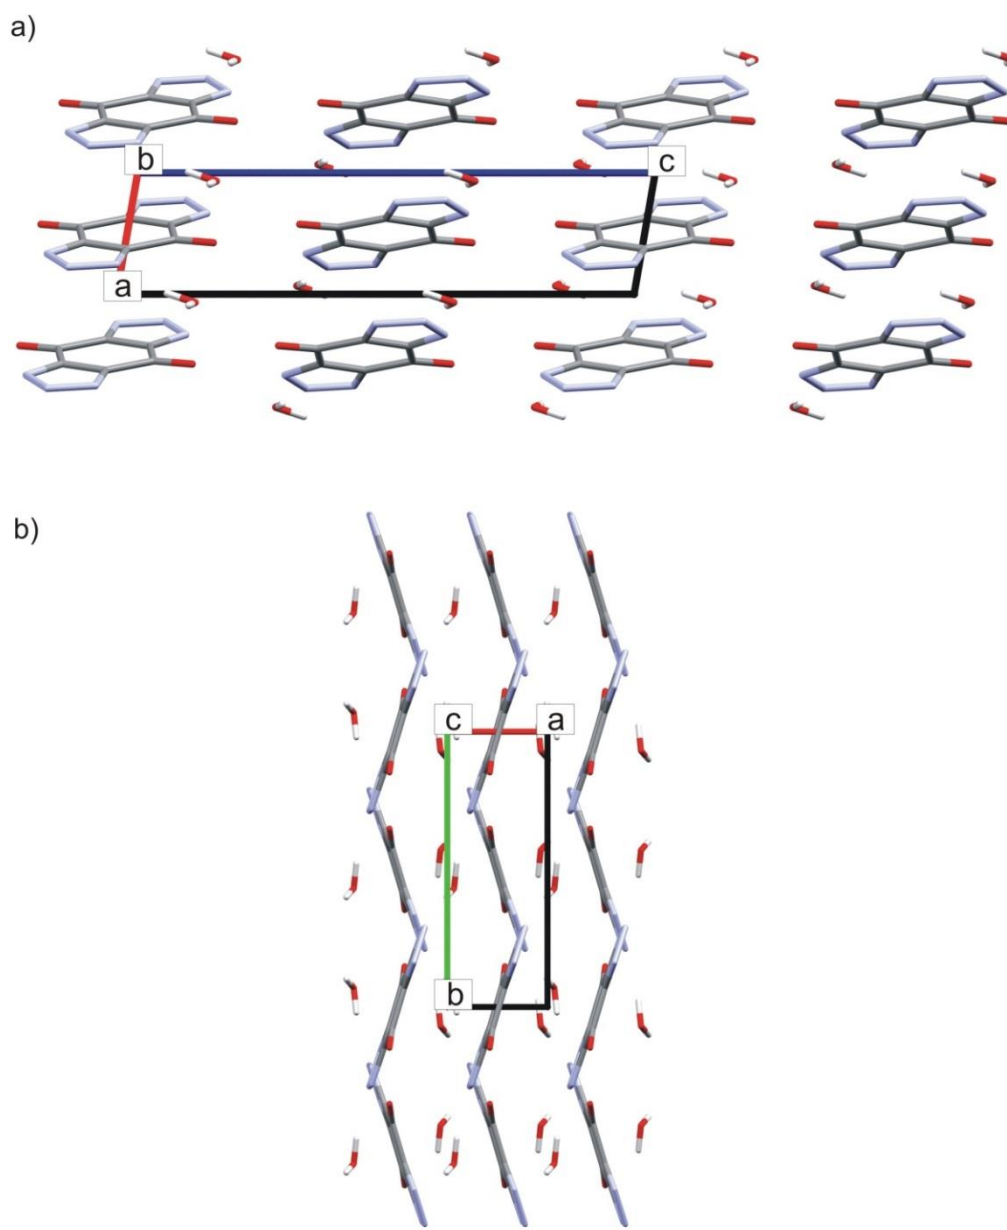

Fig. S11 Packing diagram of the structure of  $\text{Li}_2\text{-btbq}\cdot 2\text{H}_2\text{O}$ , view in *b*- (a) and *c*-direction (b). Li-cations are omitted for clarity.

Table S2. Atomic coordinates ( $\times 10^4$ ) and equivalent isotropic displacement parameters ( $\text{\AA}^2 \times 10^3$ ) of  $\text{Li}_2\text{-btbq}\cdot 2\text{H}_2\text{O}$ .  $U(\text{eq})$  is defined as one third of the trace of the orthogonalized  $U^{ij}$  tensor.

|       | x        | y        | z        | U(eq) |
|-------|----------|----------|----------|-------|
| Li(1) | -6099(6) | -8552(2) | -7101(2) | 11(1) |
| O(1)  | -5759(2) | -6478(1) | -6695(1) | 8(1)  |
| O(2)  | -681(2)  | -9307(1) | -6544(1) | 7(1)  |
| N(1)  | -3330(3) | -3372(1) | -6472(1) | 6(1)  |
| N(2)  | -2243(3) | -2117(1) | -6024(1) | 7(1)  |
| N(3)  | -2464(3) | -2203(1) | -5101(1) | 6(1)  |
| C(1)  | -4270(3) | -4292(1) | -5816(1) | 5(1)  |
| C(2)  | -3738(3) | -3557(1) | -4952(1) | 5(1)  |
| C(3)  | -5500(3) | -5819(1) | -5944(1) | 5(1)  |

Table S3. Bond lengths [ $\text{\AA}$ ] and angles [ $^\circ$ ] of  $\text{Li}_2\text{-btbq}\cdot 2\text{H}_2\text{O}$ .

|                   |             |
|-------------------|-------------|
| Li(1)-O(1)        | 1.995(2)    |
| Li(1)-O(2)#1      | 1.998(2)    |
| Li(1)-O(2)        | 2.007(2)    |
| Li(1)-N(1)#2      | 2.027(2)    |
| Li(1)-Li(1)#3     | 3.40910(11) |
| Li(1)-Li(1)#1     | 3.40910(11) |
| O(1)-C(3)         | 1.2260(13)  |
| O(2)-Li(1)#3      | 1.998(2)    |
| O(2)-H(1)         | 0.86(2)     |
| O(2)-H(2)         | 0.85(2)     |
| N(1)-N(2)         | 1.3432(14)  |
| N(1)-C(1)         | 1.3459(14)  |
| N(1)-Li(1)#4      | 2.027(2)    |
| N(2)-N(3)         | 1.3411(13)  |
| N(3)-C(2)         | 1.3491(15)  |
| C(1)-C(2)         | 1.3951(15)  |
| C(1)-C(3)         | 1.4700(16)  |
| C(2)-C(3)#5       | 1.4705(15)  |
| C(3)-C(2)#5       | 1.4705(15)  |
| O(1)-Li(1)-O(2)#1 | 103.11(10)  |

|                       |            |
|-----------------------|------------|
| O(1)-Li(1)-O(2)       | 102.26(10) |
| O(2)#1-Li(1)-O(2)     | 116.70(11) |
| O(1)-Li(1)-N(1)#2     | 101.96(10) |
| O(2)#1-Li(1)-N(1)#2   | 119.04(11) |
| O(2)-Li(1)-N(1)#2     | 110.64(10) |
| O(1)-Li(1)-Li(1)#3    | 89.54(7)   |
| O(2)#1-Li(1)-Li(1)#3  | 148.27(7)  |
| O(2)-Li(1)-Li(1)#3    | 31.57(7)   |
| N(1)#2-Li(1)-Li(1)#3  | 85.59(7)   |
| O(1)-Li(1)-Li(1)#1    | 90.46(7)   |
| O(2)#1-Li(1)-Li(1)#1  | 31.73(7)   |
| O(2)-Li(1)-Li(1)#1    | 148.43(7)  |
| N(1)#2-Li(1)-Li(1)#1  | 94.41(7)   |
| Li(1)#3-Li(1)-Li(1)#1 | 179.999(2) |
| C(3)-O(1)-Li(1)       | 136.29(10) |
| Li(1)#3-O(2)-Li(1)    | 116.70(11) |
| Li(1)#3-O(2)-H(1)     | 97.5(14)   |
| Li(1)-O(2)-H(1)       | 111.2(14)  |
| Li(1)#3-O(2)-H(2)     | 121.8(14)  |
| Li(1)-O(2)-H(2)       | 107.2(14)  |
| H(1)-O(2)-H(2)        | 100(2)     |
| N(2)-N(1)-C(1)        | 106.65(9)  |
| N(2)-N(1)-Li(1)#4     | 121.58(10) |
| C(1)-N(1)-Li(1)#4     | 131.37(10) |
| N(3)-N(2)-N(1)        | 111.35(9)  |
| N(2)-N(3)-C(2)        | 106.50(9)  |
| N(1)-C(1)-C(2)        | 107.71(10) |
| N(1)-C(1)-C(3)        | 127.75(10) |
| C(2)-C(1)-C(3)        | 124.51(10) |
| N(3)-C(2)-C(1)        | 107.80(10) |
| N(3)-C(2)-C(3)#5      | 127.52(10) |
| C(1)-C(2)-C(3)#5      | 124.68(10) |
| O(1)-C(3)-C(1)        | 124.03(10) |
| O(1)-C(3)-C(2)#5      | 125.19(10) |
| C(1)-C(3)-C(2)#5      | 110.76(9)  |

Symmetry transformations used to generate equivalent atoms:

#1  $x-1, y, z$  #2  $-x-1, y-1/2, -z-3/2$  #3  $x+1, y, z$

#4  $-x-1, y+1/2, -z-3/2$  #5  $-x-1, -y-1, -z-1$

Table S4. Anisotropic displacement parameters ( $\text{\AA}^2 \times 10^3$ ) of  $\text{Li}_2\text{-btbq} \cdot 2\text{H}_2\text{O}$ .

The anisotropic displacement factor exponent takes the form:  $-2\pi^2 [ h^2 a^{*2} U^{11} + \dots + 2 h k a^* b^* U^{12} ]$

|       | $U^{11}$ | $U^{22}$ | $U^{33}$ | $U^{23}$ | $U^{13}$ | $U^{12}$ |
|-------|----------|----------|----------|----------|----------|----------|
| Li(1) | 13(1)    | 10(1)    | 9(1)     | 0(1)     | 2(1)     | 0(1)     |
| O(1)  | 12(1)    | 7(1)     | 5(1)     | -2(1)    | 2(1)     | -1(1)    |
| O(2)  | 11(1)    | 5(1)     | 6(1)     | 0(1)     | 1(1)     | -2(1)    |
| N(1)  | 6(1)     | 5(1)     | 6(1)     | 0(1)     | 1(1)     | 0(1)     |
| N(2)  | 8(1)     | 6(1)     | 6(1)     | 0(1)     | 1(1)     | -1(1)    |
| N(3)  | 8(1)     | 5(1)     | 5(1)     | 0(1)     | 1(1)     | 0(1)     |
| C(1)  | 6(1)     | 5(1)     | 4(1)     | 1(1)     | 1(1)     | 1(1)     |
| C(2)  | 6(1)     | 5(1)     | 5(1)     | 0(1)     | 1(1)     | 0(1)     |
| C(3)  | 5(1)     | 5(1)     | 6(1)     | 0(1)     | 0(1)     | 0(1)     |

Table S5. Hydrogen Bonds.

| Donor---Hydrogen...Acceptor                        | Don--Hyd [ $\text{\AA}$ ] | Hyd--Acc [ $\text{\AA}$ ] | Don--Acc [ $\text{\AA}$ ] | D--H-----A    |
|----------------------------------------------------|---------------------------|---------------------------|---------------------------|---------------|
| $\text{O2}\gg 3\text{---H2}\gg 3\text{...N2}\gg 2$ | 0.85                      | 1.93                      | 2.770                     | $168.6^\circ$ |
| $\text{O2}\gg 4\text{---H2}\gg 4\text{...N2}\gg 5$ | 0.85                      | 1.93                      | 2.770                     | $168.6^\circ$ |

### *X-ray single crystal analysis of $\text{Na}_2\text{-btbq} \cdot 4\text{H}_2\text{O}$*

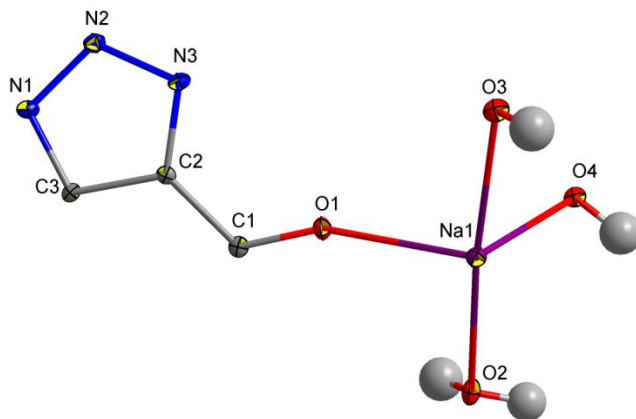

Fig. S12 ORTEP-style plot of the asymmetric units  $\text{Na}_2\text{-btbq} \cdot 4\text{H}_2\text{O}$ . Thermal ellipsoids probability: 50 %.

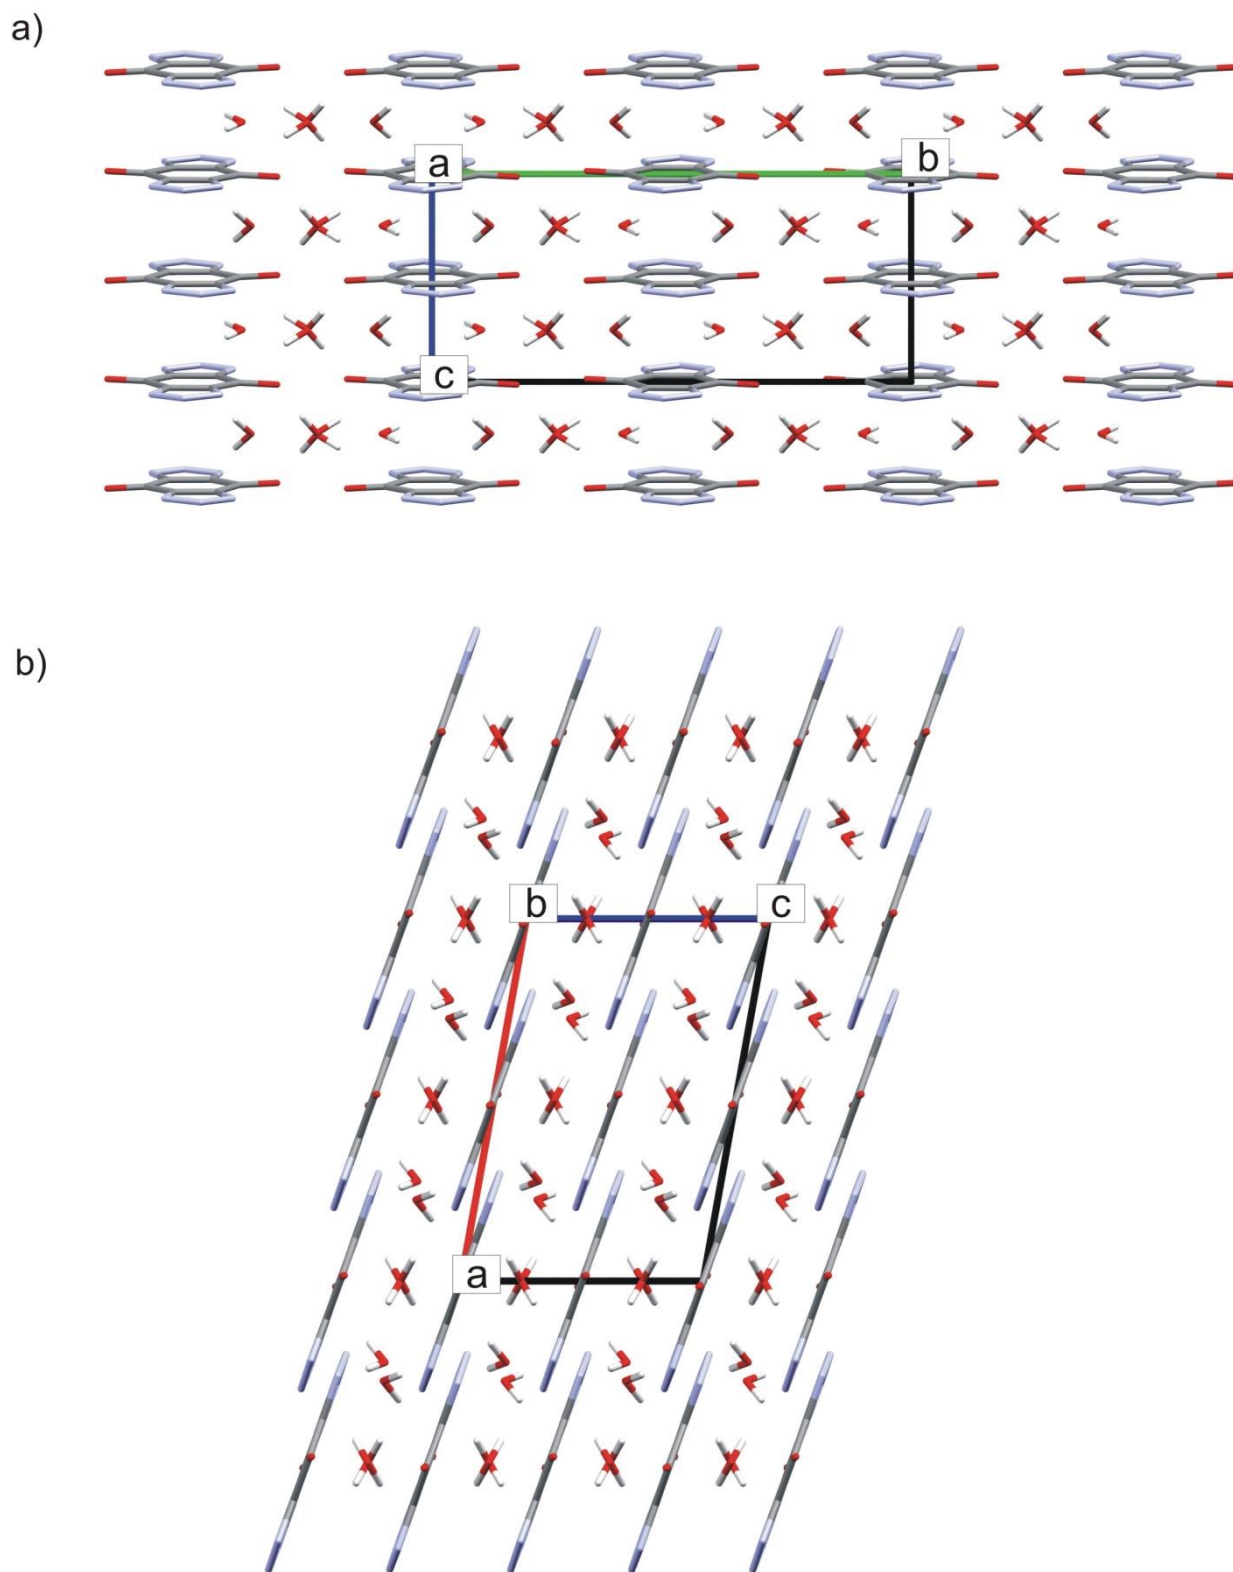

Fig. S13 Packing diagram of the structure of  $\text{Na}_2\text{-btbq}\cdot 4\text{H}_2\text{O}$ , view in  $a$ - (a) and  $b$ -direction (b). Na-cations are omitted for clarity.

Table S6. Atomic coordinates ( $\times 10^4$ ) and equivalent isotropic displacement parameters ( $\text{\AA}^2 \times 10^3$ ) of  $\text{Na}_2\text{-btbq}\cdot 4\text{H}_2\text{O}$ .  $U(\text{eq})$  is defined as one third of the trace of the orthogonalized  $U^{ij}$  tensor.

|       | x       | y       | z       | U(eq) |
|-------|---------|---------|---------|-------|
| Na(1) | 6227(1) | 8116(1) | 5160(1) | 10(1) |
| O(1)  | 5156(1) | 6768(1) | 4867(2) | 10(1) |
| O(2)  | 7757(1) | 7402(1) | 7533(2) | 11(1) |
| O(3)  | 5000    | 8767(1) | 7500    | 13(1) |
| O(4)  | 5000    | 8954(1) | 2500    | 10(1) |
| N(1)  | 2623(1) | 4420(1) | 5611(2) | 8(1)  |
| N(2)  | 2031(1) | 5176(1) | 5797(2) | 9(1)  |
| N(3)  | 2826(1) | 5844(1) | 5611(2) | 8(1)  |
| C(1)  | 5112(2) | 5981(1) | 4958(2) | 7(1)  |
| C(2)  | 3952(1) | 5503(1) | 5286(2) | 7(1)  |
| C(3)  | 3829(1) | 4611(1) | 5295(2) | 6(1)  |

Table S7. Bond lengths [ $\text{\AA}$ ] and angles [ $^\circ$ ] of  $\text{Na}_2\text{-btbq}\cdot 4\text{H}_2\text{O}$ .

|               |            |
|---------------|------------|
| Na(1)-O(2)    | 2.3458(13) |
| Na(1)-O(1)    | 2.3668(12) |
| Na(1)-O(4)    | 2.4165(11) |
| Na(1)-O(2)#1  | 2.4241(13) |
| Na(1)-O(3)    | 2.4433(9)  |
| Na(1)-N(1)#2  | 2.4838(14) |
| Na(1)-Na(1)#1 | 3.3126(12) |
| Na(1)-Na(1)#3 | 4.0690(12) |
| O(1)-C(1)     | 1.2265(18) |
| O(2)-Na(1)#1  | 2.4241(13) |
| O(2)-H(1)     | 0.837(16)  |
| O(2)-H(2)     | 0.816(16)  |
| O(3)-Na(1)#4  | 2.4433(9)  |
| O(3)-H(3)     | 0.85(2)    |
| O(4)-Na(1)#3  | 2.4165(11) |
| O(4)-H(4)     | 0.83(2)    |
| N(1)-N(2)     | 1.3431(18) |

|                       |            |
|-----------------------|------------|
| N(1)-C(3)             | 1.3480(18) |
| N(1)-Na(1)#5          | 2.4838(14) |
| N(2)-N(3)             | 1.3498(18) |
| N(3)-C(2)             | 1.3437(19) |
| C(1)-C(2)             | 1.471(2)   |
| C(1)-C(3)#6           | 1.471(2)   |
| C(2)-C(3)             | 1.394(2)   |
| C(3)-C(1)#6           | 1.471(2)   |
| O(2)-Na(1)-O(1)       | 83.84(4)   |
| O(2)-Na(1)-O(4)       | 169.42(4)  |
| O(1)-Na(1)-O(4)       | 103.57(5)  |
| O(2)-Na(1)-O(2)#1     | 92.04(4)   |
| O(1)-Na(1)-O(2)#1     | 84.56(4)   |
| O(4)-Na(1)-O(2)#1     | 81.29(4)   |
| O(2)-Na(1)-O(3)       | 96.44(4)   |
| O(1)-Na(1)-O(3)       | 97.38(5)   |
| O(4)-Na(1)-O(3)       | 90.15(3)   |
| O(2)#1-Na(1)-O(3)     | 171.44(4)  |
| O(2)-Na(1)-N(1)#2     | 89.36(4)   |
| O(1)-Na(1)-N(1)#2     | 172.39(5)  |
| O(4)-Na(1)-N(1)#2     | 82.73(4)   |
| O(2)#1-Na(1)-N(1)#2   | 92.29(4)   |
| O(3)-Na(1)-N(1)#2     | 86.75(5)   |
| O(2)-Na(1)-Na(1)#1    | 47.00(3)   |
| O(1)-Na(1)-Na(1)#1    | 81.64(4)   |
| O(4)-Na(1)-Na(1)#1    | 125.83(3)  |
| O(2)#1-Na(1)-Na(1)#1  | 45.05(3)   |
| O(3)-Na(1)-Na(1)#1    | 143.43(4)  |
| N(1)#2-Na(1)-Na(1)#1  | 91.22(4)   |
| O(2)-Na(1)-Na(1)#3    | 149.79(3)  |
| O(1)-Na(1)-Na(1)#3    | 73.21(3)   |
| O(4)-Na(1)-Na(1)#3    | 32.66(4)   |
| O(2)#1-Na(1)-Na(1)#3  | 66.89(3)   |
| O(3)-Na(1)-Na(1)#3    | 105.61(2)  |
| N(1)#2-Na(1)-Na(1)#3  | 111.91(3)  |
| Na(1)#1-Na(1)-Na(1)#3 | 108.95(3)  |



|                    |            |
|--------------------|------------|
| C(1)-O(1)-Na(1)    | 154.22(10) |
| Na(1)-O(2)-Na(1)#1 | 87.96(4)   |
| Na(1)-O(2)-H(1)    | 123.8(17)  |
| Na(1)#1-O(2)-H(1)  | 106.2(16)  |
| Na(1)-O(2)-H(2)    | 117.5(17)  |
| Na(1)#1-O(2)-H(2)  | 110.5(18)  |
| H(1)-O(2)-H(2)     | 108(2)     |
| Na(1)#4-O(3)-Na(1) | 130.98(8)  |
| Na(1)#4-O(3)-H(3)  | 107.9(17)  |
| Na(1)-O(3)-H(3)    | 100.7(17)  |
| Na(1)#3-O(4)-Na(1) | 114.69(7)  |
| Na(1)#3-O(4)-H(4)  | 114.7(17)  |
| Na(1)-O(4)-H(4)    | 102.4(17)  |
| N(2)-N(1)-C(3)     | 106.31(12) |
| N(2)-N(1)-Na(1)#5  | 117.21(9)  |
| C(3)-N(1)-Na(1)#5  | 134.66(10) |
| N(1)-N(2)-N(3)     | 111.40(12) |
| C(2)-N(3)-N(2)     | 106.33(12) |
| O(1)-C(1)-C(2)     | 123.45(14) |
| O(1)-C(1)-C(3)#6   | 125.59(14) |
| C(2)-C(1)-C(3)#6   | 110.94(12) |
| N(3)-C(2)-C(3)     | 107.97(13) |
| N(3)-C(2)-C(1)     | 126.41(14) |
| C(3)-C(2)-C(1)     | 125.62(13) |
| N(1)-C(3)-C(2)     | 107.97(13) |
| N(1)-C(3)-C(1)#6   | 128.60(14) |
| C(2)-C(3)-C(1)#6   | 123.41(13) |

---

Symmetry transformations used to generate equivalent atoms:

#1  $-x+3/2, -y+3/2, -z+1$  #2  $x+1/2, y+1/2, z$  #3  $-x+1, y, -z+1/2$   
#4  $-x+1, y, -z+3/2$  #5  $x-1/2, y-1/2, z$  #6  $-x+1, -y+1, -z+1$

Table S8. Anisotropic displacement parameters ( $\text{\AA}^2 \times 10^3$ ) of  $\text{Na}_2\text{-btbq}\cdot 4\text{H}_2\text{O}$ .

The anisotropic displacement factor exponent takes the form:  $-2\pi^2 [ h^2 a^{*2} U^{11} + \dots + 2 h k a^* b^* U^{12} ]$

---

| $U^{11}$ | $U^{22}$ | $U^{33}$ | $U^{23}$ | $U^{13}$ | $U^{12}$ |
|----------|----------|----------|----------|----------|----------|
|----------|----------|----------|----------|----------|----------|

---

|       |       |       |       |       |       |       |
|-------|-------|-------|-------|-------|-------|-------|
| Na(1) | 9(1)  | 9(1)  | 11(1) | 1(1)  | 2(1)  | -1(1) |
| O(1)  | 12(1) | 7(1)  | 12(1) | 0(1)  | 2(1)  | -1(1) |
| O(2)  | 12(1) | 9(1)  | 11(1) | 1(1)  | 1(1)  | -3(1) |
| O(3)  | 11(1) | 15(1) | 13(1) | 0     | 2(1)  | 0     |
| O(4)  | 9(1)  | 10(1) | 12(1) | 0     | 2(1)  | 0     |
| N(1)  | 7(1)  | 10(1) | 8(1)  | -1(1) | 2(1)  | 1(1)  |
| N(2)  | 8(1)  | 10(1) | 10(1) | -1(1) | 2(1)  | -1(1) |
| N(3)  | 7(1)  | 11(1) | 7(1)  | -1(1) | 1(1)  | -1(1) |
| C(1)  | 8(1)  | 8(1)  | 4(1)  | 0(1)  | -1(1) | 0(1)  |
| C(2)  | 7(1)  | 7(1)  | 6(1)  | 0(1)  | 0(1)  | 0(1)  |
| C(3)  | 6(1)  | 8(1)  | 5(1)  | 0(1)  | 1(1)  | -1(1) |

Table S9. Hydrogen Bonds

| Donor---Hydrogen...Acceptor | Don--Hyd [Å] | Hyd--Acc [Å] | Don--Acc [Å] | D--H-----A |
|-----------------------------|--------------|--------------|--------------|------------|
| O2---H1...N3»2              | 0.84         | 2.02         | 2.851        | 174.2°     |
| O2---H2...O1»12             | 0.82         | 2.23         | 3.012        | 159.5°     |
| O3---H3...N2»12             | 0.85         | 2.43         | 3.256        | 163.9°     |
| O4---H4...N2»11             | 0.83         | 2.12         | 2.927        | 165.8°     |
| O2»1---H1»1...N3»7          | 0.84         | 2.02         | 2.851        | 174.2°     |
| O2»2---H1»2...N3            | 0.84         | 2.02         | 2.851        | 174.2°     |
| O2»3---H1»3...N3»8          | 0.84         | 2.02         | 2.851        | 174.2°     |
| O2»3---H2»3...O1»16         | 0.82         | 2.23         | 3.012        | 159.5°     |
| O3»3---H3»3...N2»16         | 0.85         | 2.43         | 3.256        | 163.9°     |
| O4»3---H4»3...N2»15         | 0.83         | 2.12         | 2.927        | 165.8°     |
| O2»4---H1»4...N3»11         | 0.84         | 2.02         | 2.851        | 174.2°     |
| O2»4---H2»4...O1»1          | 0.82         | 2.23         | 3.012        | 159.5°     |
| O3»4---H3»4...N2»1          | 0.85         | 2.43         | 3.256        | 163.9°     |
| O4»4---H4»4...N2»2          | 0.83         | 2.12         | 2.927        | 165.8°     |
| O2»5---H1»5...N3»13         | 0.84         | 2.02         | 2.851        | 174.2°     |
| O2»6---H1»6...N3»15         | 0.84         | 2.02         | 2.851        | 174.2°     |
| O2»6---H2»6...O1»10         | 0.82         | 2.23         | 3.012        | 159.5°     |
| O3»6---H3»6...N2»10         | 0.85         | 2.43         | 3.256        | 163.9°     |
| O4»6---H4»6...N2»8          | 0.83         | 2.12         | 2.927        | 165.8°     |
| O2»7---H1»7...N3»1          | 0.84         | 2.02         | 2.851        | 174.2°     |
| O2»7---H2»7...O1»11         | 0.82         | 2.23         | 3.012        | 159.5°     |
| O3»1---H3»7...N2»11         | 0.85         | 2.43         | 3.256        | 163.9°     |
| O2»8---H1»8...N3»3          | 0.84         | 2.02         | 2.851        | 174.2°     |
| O4»2---H4»9...N2»12         | 0.83         | 2.12         | 2.927        | 165.8°     |
| O2»11---H1»11...N3»4        | 0.84         | 2.02         | 2.851        | 174.2°     |
| O2»13---H1»13...N3»5        | 0.84         | 2.02         | 2.851        | 174.2°     |
| O2»15---H1»15...N3»6        | 0.84         | 2.02         | 2.851        | 174.2°     |

***X-ray single crystal analysis of  $K_2$ -btbq·2H<sub>2</sub>O***

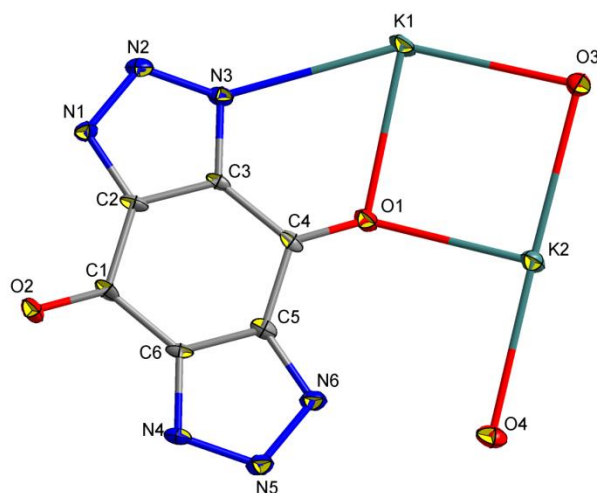

Fig. S14 ORTEP-style plot of the asymmetric units  $K_2$ -btbq·2H<sub>2</sub>O. Thermal ellipsoids probability: 50 %. Hydrogen atoms have been omitted for clarity.

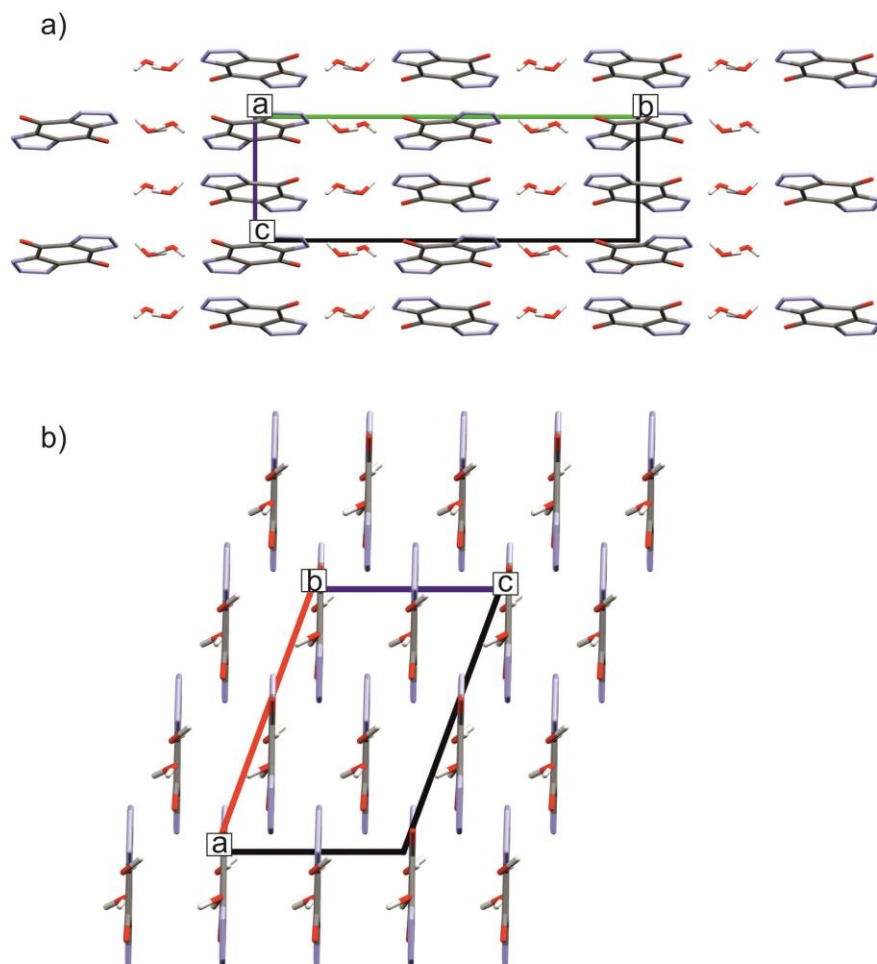

Fig. S15 Packing diagram of the structure of  $K_2$ -btbq·2H<sub>2</sub>O, view in *a*- (a) and *b*-direction (b). K-cations are omitted for clarity.

Table S10. Atomic coordinates ( $\times 10^4$ ) and equivalent isotropic displacement parameters ( $\text{\AA}^2 \times 10^3$ ) of  $\text{K}_2\text{-btbq}\cdot 2\text{H}_2\text{O}$ .  $U(\text{eq})$  is defined as one third of the trace of the orthogonalized  $U^{ij}$  tensor.

|      | x       | y       | z       | $U(\text{eq})$ |
|------|---------|---------|---------|----------------|
| K(1) | 1269(1) | 5766(1) | 2423(1) | 18(1)          |
| K(2) | 3740(1) | 7477(1) | 5941(2) | 16(1)          |
| O(1) | 8346(3) | 3865(2) | 7006(5) | 15(1)          |
| O(2) | 4200(3) | 6096(2) | 5059(4) | 15(1)          |
| O(3) | 6730(3) | 7790(2) | 6180(5) | 17(1)          |
| O(4) | 774(3)  | 7142(2) | 5521(5) | 18(1)          |
| N(1) | 7560(3) | 6321(2) | 6714(5) | 13(1)          |
| N(2) | 9038(4) | 6139(2) | 7447(6) | 14(1)          |
| N(3) | 9223(4) | 5414(2) | 7556(6) | 13(1)          |
| N(4) | 3323(3) | 4536(2) | 4663(5) | 13(1)          |
| N(5) | 3512(4) | 3807(2) | 4732(6) | 16(1)          |
| N(6) | 4986(4) | 3627(2) | 5428(6) | 17(1)          |
| C(1) | 5131(4) | 5596(2) | 5527(6) | 12(1)          |
| C(2) | 6779(4) | 5697(2) | 6356(6) | 13(1)          |
| C(3) | 7812(4) | 5128(2) | 6876(6) | 10(1)          |
| C(4) | 7415(4) | 4359(2) | 6613(5) | 11(1)          |
| C(5) | 5763(4) | 4260(2) | 5828(5) | 11(1)          |
| C(6) | 4731(4) | 4825(2) | 5351(6) | 11(1)          |

Table S11. Bond lengths [ $\text{\AA}$ ] and angles [ $^\circ$ ] of  $\text{K}_2\text{-btbq}\cdot 2\text{H}_2\text{O}$ .

|             |          |
|-------------|----------|
| K(1)-O(2)   | 2.757(3) |
| K(1)-O(1)#1 | 2.759(3) |
| K(1)-O(3)#2 | 2.851(3) |
| K(1)-N(3)#1 | 2.926(3) |
| K(1)-N(4)   | 3.000(3) |
| K(1)-N(4)#3 | 3.075(3) |
| K(1)-N(3)#4 | 3.091(3) |
| K(1)-N(2)#4 | 3.204(3) |
| K(1)-N(5)#3 | 3.237(4) |
| K(1)-O(4)   | 3.338(3) |

|              |            |
|--------------|------------|
| K(1)-C(4)#1  | 3.495(3)   |
| K(1)-C(1)    | 3.502(3)   |
| K(2)-O(2)    | 2.674(3)   |
| K(2)-O(1)#5  | 2.703(3)   |
| K(2)-O(4)    | 2.783(3)   |
| K(2)-O(3)    | 2.828(3)   |
| K(2)-O(4)#6  | 2.959(3)   |
| K(2)-O(3)#2  | 2.999(3)   |
| K(2)-N(1)#2  | 3.356(3)   |
| K(2)-N(6)#7  | 3.363(4)   |
| K(2)-N(5)#7  | 3.433(4)   |
| K(2)-N(2)#2  | 3.452(4)   |
| K(2)-K(1)#6  | 3.9364(12) |
| K(2)-H(3)    | 3.02(5)    |
| O(1)-C(4)    | 1.227(5)   |
| O(1)-K(2)#8  | 2.703(3)   |
| O(1)-K(1)#9  | 2.759(3)   |
| O(2)-C(1)    | 1.234(4)   |
| O(3)-K(1)#6  | 2.851(3)   |
| O(3)-K(2)#6  | 2.999(3)   |
| O(3)-H(1)    | 0.88(2)    |
| O(3)-H(2)    | 0.89(2)    |
| O(4)-K(2)#2  | 2.959(3)   |
| O(4)-H(3)    | 0.891(19)  |
| O(4)-H(4)    | 0.873(19)  |
| N(1)-C(2)    | 1.342(5)   |
| N(1)-N(2)    | 1.349(4)   |
| N(1)-K(2)#6  | 3.356(3)   |
| N(2)-N(3)    | 1.346(5)   |
| N(2)-K(1)#10 | 3.204(3)   |
| N(2)-K(2)#6  | 3.452(4)   |
| N(3)-C(3)    | 1.354(5)   |
| N(3)-K(1)#9  | 2.926(3)   |
| N(3)-K(1)#10 | 3.091(3)   |
| N(4)-C(6)    | 1.354(4)   |
| N(4)-N(5)    | 1.354(5)   |

|                    |            |
|--------------------|------------|
| N(4)-K(1)#7        | 3.075(3)   |
| N(5)-N(6)          | 1.346(5)   |
| N(5)-K(1)#7        | 3.237(4)   |
| N(5)-K(2)#3        | 3.433(4)   |
| N(6)-C(5)          | 1.354(5)   |
| N(6)-K(2)#3        | 3.363(4)   |
| C(1)-C(6)          | 1.464(6)   |
| C(1)-C(2)          | 1.469(5)   |
| C(2)-C(3)          | 1.390(5)   |
| C(3)-C(4)          | 1.461(5)   |
| C(4)-C(5)          | 1.472(5)   |
| C(4)-K(1)#9        | 3.495(3)   |
| C(5)-C(6)          | 1.385(5)   |
| O(2)-K(1)-O(1)#1   | 139.59(9)  |
| O(2)-K(1)-O(3)#2   | 75.26(9)   |
| O(1)#1-K(1)-O(3)#2 | 89.19(9)   |
| O(2)-K(1)-N(3)#1   | 132.71(9)  |
| O(1)#1-K(1)-N(3)#1 | 62.60(9)   |
| O(3)#2-K(1)-N(3)#1 | 150.01(9)  |
| O(2)-K(1)-N(4)     | 62.10(8)   |
| O(1)#1-K(1)-N(4)   | 133.69(9)  |
| O(3)#2-K(1)-N(4)   | 134.51(9)  |
| N(3)#1-K(1)-N(4)   | 75.47(8)   |
| O(2)-K(1)-N(4)#3   | 71.92(8)   |
| O(1)#1-K(1)-N(4)#3 | 142.50(9)  |
| O(3)#2-K(1)-N(4)#3 | 79.97(9)   |
| N(3)#1-K(1)-N(4)#3 | 115.61(10) |
| N(4)-K(1)-N(4)#3   | 72.71(8)   |
| O(2)-K(1)-N(3)#4   | 143.18(9)  |
| O(1)#1-K(1)-N(3)#4 | 72.43(9)   |
| O(3)#2-K(1)-N(3)#4 | 91.26(9)   |
| N(3)#1-K(1)-N(3)#4 | 71.50(8)   |
| N(4)-K(1)-N(3)#4   | 113.10(10) |
| N(4)#3-K(1)-N(3)#4 | 72.05(8)   |
| O(2)-K(1)-N(2)#4   | 136.80(9)  |
| O(1)#1-K(1)-N(2)#4 | 63.84(9)   |

|                    |            |
|--------------------|------------|
| O(3)#2-K(1)-N(2)#4 | 68.79(9)   |
| N(3)#1-K(1)-N(2)#4 | 88.45(9)   |
| N(4)-K(1)-N(2)#4   | 136.46(10) |
| N(4)#3-K(1)-N(2)#4 | 78.82(9)   |
| N(3)#4-K(1)-N(2)#4 | 24.61(9)   |
| O(2)-K(1)-N(5)#3   | 64.33(8)   |
| O(1)#1-K(1)-N(5)#3 | 134.50(9)  |
| O(3)#2-K(1)-N(5)#3 | 55.82(9)   |
| N(3)#1-K(1)-N(5)#3 | 138.77(10) |
| N(4)-K(1)-N(5)#3   | 90.08(9)   |
| N(4)#3-K(1)-N(5)#3 | 24.60(9)   |
| N(3)#4-K(1)-N(5)#3 | 79.65(9)   |
| N(2)#4-K(1)-N(5)#3 | 75.79(8)   |
| O(2)-K(1)-O(4)     | 77.88(8)   |
| O(1)#1-K(1)-O(4)   | 62.07(8)   |
| O(3)#2-K(1)-O(4)   | 61.26(7)   |
| N(3)#1-K(1)-O(4)   | 108.66(9)  |
| N(4)-K(1)-O(4)     | 119.58(9)  |
| N(4)#3-K(1)-O(4)   | 135.72(9)  |
| N(3)#4-K(1)-O(4)   | 125.55(8)  |
| N(2)#4-K(1)-O(4)   | 103.84(9)  |
| N(5)#3-K(1)-O(4)   | 112.01(8)  |
| O(2)-K(1)-C(4)#1   | 151.15(9)  |
| O(1)#1-K(1)-C(4)#1 | 18.21(9)   |
| O(3)#2-K(1)-C(4)#1 | 105.68(9)  |
| N(3)#1-K(1)-C(4)#1 | 45.08(9)   |
| N(4)-K(1)-C(4)#1   | 119.19(9)  |
| N(4)#3-K(1)-C(4)#1 | 136.93(8)  |
| N(3)#4-K(1)-C(4)#1 | 65.24(9)   |
| N(2)#4-K(1)-C(4)#1 | 64.81(8)   |
| N(5)#3-K(1)-C(4)#1 | 140.57(8)  |
| O(4)-K(1)-C(4)#1   | 77.71(8)   |
| O(2)-K(1)-C(1)     | 18.23(8)   |
| O(1)#1-K(1)-C(1)   | 152.21(9)  |
| O(3)#2-K(1)-C(1)   | 90.63(9)   |
| N(3)#1-K(1)-C(1)   | 118.98(9)  |

|                    |            |
|--------------------|------------|
| N(4)-K(1)-C(1)     | 44.86(9)   |
| N(4)#3-K(1)-C(1)   | 64.41(8)   |
| N(3)#4-K(1)-C(1)   | 135.35(9)  |
| N(2)#4-K(1)-C(1)   | 140.69(9)  |
| N(5)#3-K(1)-C(1)   | 65.02(9)   |
| O(4)-K(1)-C(1)     | 93.79(8)   |
| C(4)#1-K(1)-C(1)   | 154.39(9)  |
| O(2)-K(2)-O(1)#5   | 177.69(10) |
| O(2)-K(2)-O(4)     | 89.94(10)  |
| O(1)#5-K(2)-O(4)   | 90.81(9)   |
| O(2)-K(2)-O(3)     | 88.54(9)   |
| O(1)#5-K(2)-O(3)   | 90.80(9)   |
| O(4)-K(2)-O(3)     | 177.49(11) |
| O(2)-K(2)-O(4)#6   | 109.51(9)  |
| O(1)#5-K(2)-O(4)#6 | 68.21(9)   |
| O(4)-K(2)-O(4)#6   | 115.79(11) |
| O(3)-K(2)-O(4)#6   | 66.63(8)   |
| O(2)-K(2)-O(3)#2   | 74.03(8)   |
| O(1)#5-K(2)-O(3)#2 | 108.27(9)  |
| O(4)-K(2)-O(3)#2   | 66.62(8)   |
| O(3)-K(2)-O(3)#2   | 111.01(11) |
| O(4)#6-K(2)-O(3)#2 | 175.38(10) |
| O(2)-K(2)-N(1)#2   | 119.59(9)  |
| O(1)#5-K(2)-N(1)#2 | 62.57(8)   |
| O(4)-K(2)-N(1)#2   | 91.45(9)   |
| O(3)-K(2)-N(1)#2   | 87.57(9)   |
| O(4)#6-K(2)-N(1)#2 | 123.45(9)  |
| O(3)#2-K(2)-N(1)#2 | 52.00(8)   |
| O(2)-K(2)-N(6)#7   | 64.31(8)   |
| O(1)#5-K(2)-N(6)#7 | 113.52(9)  |
| O(4)-K(2)-N(6)#7   | 89.56(9)   |
| O(3)-K(2)-N(6)#7   | 91.57(9)   |
| O(4)#6-K(2)-N(6)#7 | 52.72(9)   |
| O(3)#2-K(2)-N(6)#7 | 131.84(9)  |
| N(1)#2-K(2)-N(6)#7 | 175.97(10) |
| O(2)-K(2)-N(5)#7   | 62.88(9)   |



|                    |            |
|--------------------|------------|
| O(1)#5-K(2)-N(5)#7 | 115.47(9)  |
| O(4)-K(2)-N(5)#7   | 67.08(9)   |
| O(3)-K(2)-N(5)#7   | 113.88(9)  |
| O(4)#6-K(2)-N(5)#7 | 69.63(9)   |
| O(3)#2-K(2)-N(5)#7 | 114.93(9)  |
| N(1)#2-K(2)-N(5)#7 | 158.53(8)  |
| N(6)#7-K(2)-N(5)#7 | 22.81(8)   |
| O(2)-K(2)-N(2)#2   | 120.92(9)  |
| O(1)#5-K(2)-N(2)#2 | 60.67(9)   |
| O(4)-K(2)-N(2)#2   | 113.83(9)  |
| O(3)-K(2)-N(2)#2   | 65.40(8)   |
| O(4)#6-K(2)-N(2)#2 | 106.63(9)  |
| O(3)#2-K(2)-N(2)#2 | 68.79(8)   |
| N(1)#2-K(2)-N(2)#2 | 22.81(7)   |
| N(6)#7-K(2)-N(2)#2 | 155.21(9)  |
| N(5)#7-K(2)-N(2)#2 | 175.77(10) |
| O(2)-K(2)-K(1)#6   | 134.77(6)  |
| O(1)#5-K(2)-K(1)#6 | 44.46(6)   |
| O(4)-K(2)-K(1)#6   | 135.26(8)  |
| O(3)-K(2)-K(1)#6   | 46.36(6)   |
| O(4)#6-K(2)-K(1)#6 | 55.75(7)   |
| O(3)#2-K(2)-K(1)#6 | 119.68(7)  |
| N(1)#2-K(2)-K(1)#6 | 69.79(6)   |
| N(6)#7-K(2)-K(1)#6 | 106.85(6)  |
| N(5)#7-K(2)-K(1)#6 | 125.37(6)  |
| N(2)#2-K(2)-K(1)#6 | 50.88(6)   |
| O(2)-K(2)-K(1)     | 41.87(6)   |
| O(1)#5-K(2)-K(1)   | 139.81(6)  |
| O(4)-K(2)-K(1)     | 54.11(7)   |
| O(3)-K(2)-K(1)     | 123.69(7)  |
| O(4)#6-K(2)-K(1)   | 140.47(7)  |
| O(3)#2-K(2)-K(1)   | 44.14(6)   |
| N(1)#2-K(2)-K(1)   | 95.95(6)   |
| N(6)#7-K(2)-K(1)   | 87.81(6)   |
| N(5)#7-K(2)-K(1)   | 71.90(6)   |
| N(2)#2-K(2)-K(1)   | 112.10(6)  |

|                    |            |
|--------------------|------------|
| K(1)#6-K(2)-K(1)   | 161.30(4)  |
| O(2)-K(2)-H(3)     | 106.8(6)   |
| O(1)#5-K(2)-H(3)   | 73.9(6)    |
| O(4)-K(2)-H(3)     | 17.0(5)    |
| O(3)-K(2)-H(3)     | 164.7(6)   |
| O(4)#6-K(2)-H(3)   | 106.7(9)   |
| O(3)#2-K(2)-H(3)   | 74.5(10)   |
| N(1)#2-K(2)-H(3)   | 85.1(10)   |
| N(6)#7-K(2)-H(3)   | 94.8(11)   |
| N(5)#7-K(2)-H(3)   | 74.3(10)   |
| N(2)#2-K(2)-H(3)   | 105.4(10)  |
| K(1)#6-K(2)-H(3)   | 118.3(6)   |
| K(1)-K(2)-H(3)     | 70.6(6)    |
| C(4)-O(1)-K(2)#8   | 143.1(2)   |
| C(4)-O(1)-K(1)#9   | 117.2(2)   |
| K(2)#8-O(1)-K(1)#9 | 92.21(9)   |
| C(1)-O(2)-K(2)     | 144.3(2)   |
| C(1)-O(2)-K(1)     | 117.5(2)   |
| K(2)-O(2)-K(1)     | 97.80(8)   |
| K(2)-O(3)-K(1)#6   | 87.77(9)   |
| K(2)-O(3)-K(2)#6   | 106.96(10) |
| K(1)#6-O(3)-K(2)#6 | 88.76(9)   |
| K(2)-O(3)-H(1)     | 130(9)     |
| K(1)#6-O(3)-H(1)   | 74(9)      |
| K(2)#6-O(3)-H(1)   | 119(8)     |
| K(2)-O(3)-H(2)     | 102(7)     |
| K(1)#6-O(3)-H(2)   | 167(8)     |
| K(2)#6-O(3)-H(2)   | 80(8)      |
| H(1)-O(3)-H(2)     | 105(10)    |
| K(2)-O(4)-K(2)#2   | 109.26(11) |
| K(2)-O(4)-K(1)     | 83.40(8)   |
| K(2)#2-O(4)-K(1)   | 77.12(7)   |
| K(2)-O(4)-H(3)     | 97(4)      |
| K(2)#2-O(4)-H(3)   | 88(4)      |
| K(1)-O(4)-H(3)     | 164(4)     |
| K(2)-O(4)-H(4)     | 140(3)     |

|                     |            |
|---------------------|------------|
| K(2)#2-O(4)-H(4)    | 109(3)     |
| K(1)-O(4)-H(4)      | 93(3)      |
| H(3)-O(4)-H(4)      | 96(5)      |
| C(2)-N(1)-N(2)      | 106.6(3)   |
| C(2)-N(1)-K(2)#6    | 135.4(2)   |
| N(2)-N(1)-K(2)#6    | 82.6(2)    |
| N(3)-N(2)-N(1)      | 111.4(3)   |
| N(3)-N(2)-K(1)#10   | 73.0(2)    |
| N(1)-N(2)-K(1)#10   | 129.9(2)   |
| N(3)-N(2)-K(2)#6    | 137.6(3)   |
| N(1)-N(2)-K(2)#6    | 74.6(2)    |
| K(1)#10-N(2)-K(2)#6 | 72.40(8)   |
| N(2)-N(3)-C(3)      | 105.9(3)   |
| N(2)-N(3)-K(1)#9    | 144.2(2)   |
| C(3)-N(3)-K(1)#9    | 106.6(2)   |
| N(2)-N(3)-K(1)#10   | 82.4(2)    |
| C(3)-N(3)-K(1)#10   | 127.2(2)   |
| K(1)#9-N(3)-K(1)#10 | 89.69(9)   |
| C(6)-N(4)-N(5)      | 106.1(3)   |
| C(6)-N(4)-K(1)      | 104.8(2)   |
| N(5)-N(4)-K(1)      | 145.2(2)   |
| C(6)-N(4)-K(1)#7    | 128.8(2)   |
| N(5)-N(4)-K(1)#7    | 84.4(2)    |
| K(1)-N(4)-K(1)#7    | 88.65(9)   |
| N(6)-N(5)-N(4)      | 111.3(3)   |
| N(6)-N(5)-K(1)#7    | 132.4(2)   |
| N(4)-N(5)-K(1)#7    | 71.0(2)    |
| N(6)-N(5)-K(2)#3    | 75.7(2)    |
| N(4)-N(5)-K(2)#3    | 134.5(2)   |
| K(1)#7-N(5)-K(2)#3  | 138.30(11) |
| N(5)-N(6)-C(5)      | 106.2(3)   |
| N(5)-N(6)-K(2)#3    | 81.5(2)    |
| C(5)-N(6)-K(2)#3    | 133.5(2)   |
| O(2)-C(1)-C(6)      | 124.2(3)   |
| O(2)-C(1)-C(2)      | 124.6(4)   |
| C(6)-C(1)-C(2)      | 111.2(3)   |

|                  |           |
|------------------|-----------|
| O(2)-C(1)-K(1)   | 44.32(17) |
| C(6)-C(1)-K(1)   | 81.58(19) |
| C(2)-C(1)-K(1)   | 162.6(3)  |
| N(1)-C(2)-C(3)   | 107.9(3)  |
| N(1)-C(2)-C(1)   | 128.2(4)  |
| C(3)-C(2)-C(1)   | 123.9(4)  |
| N(3)-C(3)-C(2)   | 108.2(3)  |
| N(3)-C(3)-C(4)   | 126.7(3)  |
| C(2)-C(3)-C(4)   | 125.0(3)  |
| O(1)-C(4)-C(3)   | 124.0(3)  |
| O(1)-C(4)-C(5)   | 125.1(4)  |
| C(3)-C(4)-C(5)   | 110.9(3)  |
| O(1)-C(4)-K(1)#9 | 44.62(19) |
| C(3)-C(4)-K(1)#9 | 80.49(19) |
| C(5)-C(4)-K(1)#9 | 164.8(2)  |
| N(6)-C(5)-C(6)   | 108.3(3)  |
| N(6)-C(5)-C(4)   | 127.5(3)  |
| C(6)-C(5)-C(4)   | 124.2(4)  |
| N(4)-C(6)-C(5)   | 108.1(3)  |
| N(4)-C(6)-C(1)   | 127.2(3)  |
| C(5)-C(6)-C(1)   | 124.7(3)  |

---

Symmetry transformations used to generate equivalent atoms:

#1  $x-1, -y+1, z-1/2$  #2  $x-1/2, -y+3/2, z-1/2$  #3  $x, -y+1, z-1/2$

#4  $x-1, y, z-1$  #5  $x-1/2, y+1/2, z$  #6  $x+1/2, -y+3/2, z+1/2$

#7  $x, -y+1, z+1/2$  #8  $x+1/2, y-1/2, z$  #9  $x+1, -y+1, z+1/2$

#10  $x+1, y, z+1$

Table S12. Anisotropic displacement parameters ( $\text{\AA}^2 \times 10^3$ ) of  $\text{K}_2\text{-btbq}\cdot 2\text{H}_2\text{O}$ .

The anisotropic displacement factor exponent takes the form:  $-2\pi^2 [ h^2 a^{*2} U^{11} + \dots + 2 h k a^* b^* U^{12} ]$

---

|      | $U^{11}$ | $U^{22}$ | $U^{33}$ | $U^{23}$ | $U^{13}$ | $U^{12}$ |
|------|----------|----------|----------|----------|----------|----------|
| K(1) | 6(1)     | 23(1)    | 22(1)    | 4(1)     | 1(1)     | -1(1)    |
| K(2) | 10(1)    | 19(1)    | 18(1)    | -3(1)    | 4(1)     | 0(1)     |

---

|      |       |       |       |       |       |       |
|------|-------|-------|-------|-------|-------|-------|
| O(1) | 10(1) | 17(1) | 17(1) | 2(1)  | 3(1)  | 2(1)  |
| O(2) | 9(1)  | 19(1) | 14(1) | -2(1) | 2(1)  | 3(1)  |
| O(3) | 18(1) | 16(1) | 20(1) | -1(1) | 10(1) | -1(1) |
| O(4) | 16(1) | 25(2) | 18(1) | -1(1) | 10(1) | -2(1) |
| N(1) | 10(1) | 12(2) | 16(2) | -2(1) | 1(1)  | -2(1) |
| N(2) | 10(1) | 18(2) | 15(2) | 3(1)  | 3(1)  | -4(1) |
| N(3) | 10(1) | 16(2) | 12(1) | 3(1)  | 3(1)  | -1(1) |
| N(4) | 8(1)  | 18(2) | 13(1) | 1(1)  | 4(1)  | -3(1) |
| N(5) | 12(1) | 17(2) | 17(2) | -1(1) | 2(1)  | -4(1) |
| N(6) | 10(1) | 17(2) | 20(2) | 2(1)  | 2(1)  | -2(1) |
| C(1) | 6(1)  | 19(2) | 8(2)  | 1(1)  | -1(1) | 3(1)  |
| C(2) | 6(1)  | 21(2) | 10(1) | 0(1)  | 2(1)  | -2(1) |
| C(3) | 6(1)  | 17(2) | 6(1)  | 1(1)  | 2(1)  | 1(1)  |
| C(4) | 10(2) | 18(2) | 8(2)  | -1(1) | 6(1)  | 2(1)  |
| C(5) | 9(1)  | 19(2) | 6(1)  | 0(1)  | 2(1)  | 0(1)  |
| C(6) | 7(1)  | 18(2) | 6(1)  | 1(1)  | 2(1)  | -3(1) |

Table S13. Hydrogen Bonds for  $K_2$ -btbq·2H<sub>2</sub>O

| Donor---Hydrogen...Acceptor | Don--Hyd [Å] | Hyd--Acc [Å] | Don--Acc [Å] | D--H----A |
|-----------------------------|--------------|--------------|--------------|-----------|
| O3---H2...N1                | 0.89         | 1.97         | 2.805        | 156.9°    |
| O4---H3...N6»2              | 0.89         | 2.02         | 2.831        | 150.8°    |
| O3»1---H2»1...N1»1          | 0.89         | 1.97         | 2.805        | 156.9°    |
| O4»1---H3»1...N6            | 0.89         | 2.02         | 2.831        | 150.8°    |
| O3»2---H2»2...N1»2          | 0.89         | 1.97         | 2.805        | 156.9°    |
| O3»3---H1»3...N5»6          | 0.88         | 2.05         | 2.870        | 154.6°    |
| O3»3---H2»3...N1»3          | 0.89         | 1.97         | 2.805        | 156.9°    |
| O4»3---H3»3...N6»10         | 0.89         | 2.02         | 2.831        | 150.8°    |
| O3»4---H1»4...N5»9          | 0.88         | 2.05         | 2.870        | 154.6°    |
| O3»4---H2»4...N1»4          | 0.89         | 1.97         | 2.805        | 156.9°    |
| O4»4---H3»4...N6»5          | 0.89         | 2.02         | 2.831        | 150.8°    |
| O3»5---H2»5...N1»5          | 0.89         | 1.97         | 2.805        | 156.9°    |
| O3»6---H2»6...N1»6          | 0.89         | 1.97         | 2.805        | 156.9°    |
| O4»6---H4»6...N2»10         | 0.87         | 2.13         | 2.994        | 173.2°    |
| O3»7---H2»7...N1»7          | 0.89         | 1.97         | 2.805        | 156.9°    |
| O3»8---H2»8...N1»8          | 0.89         | 1.97         | 2.805        | 156.9°    |
| O3»9---H2»9...N1»9          | 0.89         | 1.97         | 2.805        | 156.9°    |
| O4»9---H4»9...N2»5          | 0.87         | 2.13         | 2.994        | 173.2°    |
| O3»10---H2»10...N1»10       | 0.89         | 1.97         | 2.805        | 156.9°    |
